## **A reference panel of 64,976 haplotypes for genotype imputation**

The Haplotype Reference Consortium\*

\*A full author list appears at the end of the paper

### **Corresponding authors**

**Professor Jonathan Marchini** [marchini@stats.ox.ac.uk](mailto:marchini@stats.ox.ac.uk)

**Professor Goncalo Abecasis** [goncalo@umich.edu](mailto:goncalo@umich.edu)

**Professor Richard Durbin** [rd@sanger.ac.uk](mailto:rd@sanger.ac.uk)

**We describe a reference panel of 64,976 haplotypes at 39,235,157 SNPs constructed using whole genome sequence data from 20 studies of predominantly European ancestry. Using this resource leads to accurate genotype imputation at minor allele frequencies as low as 0.1%, a large increase in the number of SNPs tested in association studies and can help to refine causal loci. We describe remote server resources that allow researchers to carry out imputation and phasing consistently and efficiently.**

Over the last decade, large scale international collaborative efforts have created successively larger and more ethnically diverse genetic variation resources. For example, in 2007 the International HapMap Project produced a haplotype reference panel of 420 haplotypes at 3.1M SNPs in 3 continental populations<sup>1</sup>. More recently, the 1000 Genomes Project has produced a series of datasets built using low-coverage whole genome sequencing (WGS), culminating in 2015 in a reference panel (1000GP3) of 5,008 haplotypes at over 88M variants from 26 world-wide populations<sup>2</sup>. In addition, several other projects have collected low-coverage WGS data in large numbers of samples that could potentially also be used to build haplotype reference panels<sup>3-5</sup>. A major use of these resources has been to facilitate imputation of unobserved genotypes into genome-wide association study (GWAS) samples that have been assayed using relatively sparse genome-wide microarray chips. As the reference panels have increased in number of haplotypes, SNPs and populations, genotype imputation accuracy has increased, allowing researchers to impute and test SNPs for association at ever lower minor allele frequencies. A succession of methods developments have provided researchers with the tools to cope with these increasing larger panels<sup>6-11</sup>.

We formed the Haplotype Reference Consortium (HRC) (see **URLs**) to bring together as many WGS datasets as possible to build a much larger combined haplotype reference panel. By doing so, our aim is to provide a single centralized resource for human genetics researchers to carry out genotype imputation. Here we describe the first HRC reference panel that combines datasets from 20

different studies (**Supplementary Table 1**). The majority of these studies have low-coverage WGS data (4-8X coverage) and are known to consist of samples with predominantly European ancestry. However the 1000 Genomes Phase 3 cohort, which has diverse ancestry, is also included. This reference panel consists of 64,976 haplotypes at 39,235,157 SNPs that have evidence of having a minor allele count (MAC) greater or equal to 5.

We took the following approach to create the reference panel. We combined existing sets of genotype calls from each study to determine a ‘union’ set of 95,855,206 SNP sites with  $MAC \geq 2$ . After initial tests, we decided for this first version of the HRC panel not to include small insertions and deletions (indels), since these were very inconsistently called across projects. We then used a standard tool to calculate the genotype likelihoods consistently for each sample at each site from the original study BAM files (see **Methods**) and make a baseline set of non-LD based genotype calls. We next applied a number of filters to remove poor quality sites (see **Methods**). We restricted this site list to sites with  $MAC \geq 5$ , corresponding to a minimum minor allele frequency (MAF) of 0.0077%, then added back sites that are present on several commonly used SNP microarray chips in GWAS. Sites with lower MAF would be likely to be poorly imputed. This site list consisting of 44,187,567 sites exhibited improved quality compared to  $MAC \geq 5$  site list when assessed by measuring a per sample transition-to-transversion (Ts/Tv) ratio (**Supplementary Figure 1**). We also detected and removed 301 duplicate samples across the whole dataset (see **Methods**).

Calling genotypes and phasing using low-coverage WGS data has been a computational challenging step for many of the 20 studies providing data. To reduce computation, we carried out this step on all 32,611 samples together and leveraged the original separately called haplotypes from each study to help reduce the search space of the calling algorithm (see **Methods**). We then applied a further refinement step by re-phasing the called genotypes using the SHAPEIT3 method<sup>12</sup>, based on experience from the UK10K project, which found this re-phasing approach produced substantially improved imputation accuracy when

using the haplotypes<sup>4</sup>. After final genotype calling, we removed a further 123 samples (see **Methods**) and filtered out 4,952,410 sites whose MAC after refinement and sample removal was below 5, resulting in a final set of 39,235,157 sites and 32,488 samples. By measuring genotype discordance of the called genotypes compared to Illumina OMNI2.5M chip genotypes available on the 1000 Genomes samples we showed that both our site filtering strategy and the increased sample size of HRC led to improved accuracy (Supplementary Table 2). For example, we obtained a non-reference allele discordance of 0.39% on the full HRC dataset with site filtering, compared to 0.67% on the subset of 1000GP3 samples.

We next carried out experiments to assess and illustrate the downstream imputation performance compared to previous haplotype reference panels. To mimic a typical imputation analysis, we created a pseudo-GWAS dataset using high-coverage Complete Genomics (CG) WGS genotypes on 10 CEU samples (see **URLs**). We extracted the CG SNP genotypes at all the sites included on an Illumina 1M SNP array (Human1M-Duo v3C). These were used to impute the remaining genotypes which were then compared to the held out genotypes, stratifying results by MAF of the imputed sites. **Figure 1** shows that the HRC reference panel leads to a large increase in imputation performance compared to the 1000GP3 ( $R^2=0.64$  vs  $R^2=0.36$  at MAF = 0.1%) and also that the re-phasing step using SHAPEIT3 is worthwhile. HRC imputation at 0.1% frequency provides similar accuracy to 1000GP3 imputation at 0.6% frequency.

To illustrate the benefits of using the HRC resource, we imputed a GWAS study of 1,210 samples from the InCHIANTI study<sup>13</sup>, including 534 that did not contribute to the HRC reference panel because they were not sequenced. Imputing using the HRC panel resulted in 15,501,516 SNPs passing an imputation quality threshold of  $r^2>0.5$  compared to 13,238,968 variants (11,908,509 SNPs and 1,330,459 indels) when imputing using 1000 Genomes Phase 3, an increase of over 2 million variants. The majority of these additional SNPs occur at the lower frequency range (**Supplementary Table 3**). We next tested the HRC imputed genotypes for association with 93 circulating blood marker phenotypes,

including many of relevance to human health such as lipids, vitamins, ions, inflammatory markers and adipokines<sup>14,15</sup>. This analysis highlighted potential novel associations (**Supplementary Table 4**) and also that it is possible for HRC imputation to refine signals of association. For example, **Figure 2** shows the association results of HapMap2, 1000GP3 and HRC based imputation for the  $\alpha_1$ -antitrypsin phenotype at the *SERPINA1* locus. HRC imputation gives a clear refinement of the signal at the rare causal SNP rs28929474 (MAF=0.5%) (**Supplementary Table 5**), known to predispose to the alpha 1 antitrypsin deficiency lung condition emphysema<sup>16,17</sup>.

Since the HRC reference panel combines data from many different studies with a range of restrictions on data release we have developed centralized imputation server resources (see **URLs**). Under this model researchers upload phased or unphased genotype data and imputation is carried out on central servers. Once completed researchers can download imputed datasets. Along similar lines, we have also developed a lower throughput phasing server for haplotype estimation of clinical samples with genotypes from high-coverage WGS data that takes advantage of rare variant sharing<sup>18</sup> (see **URLs**).

This first release of the HRC is the largest human genetic variation resource to date and has been created via an unprecedented collaboration of data sharing across many groups. We envisage continuing to expand the HRC and are currently planning a second HRC release differing from the first release in two ways. Firstly, we aim to substantially increase the ethnic diversity of the panel, by including data from sequencing studies in world-wide sample sets such as the CONVERGE study<sup>19</sup>, AGVP<sup>20</sup> and HGDP<sup>21</sup>. Secondly, we aim to include short insertions and deletions in addition to SNP variants. Thinking further ahead, we hope to work closely with efforts under way to collect large samples of high-coverage sequenced samples such as the UK 100,000 Genomes Project (see **URLs**).

## Online methods

### Union site list

Every study provided us with their most recent version of their haplotypes in VCF format with one VCF for every autosome. For every cohort, bcftools (v0.2.0-rc12) was used to create an entire-autosome, SNP-only site list with alternate and total allele count information from these per-chromosome haplotypes. Multiallelic SNPs were broken into biallelics using 'bcftools norm'. These per-cohort site lists were merged into a single file using an in-house Perl script that correctly merges alternate and total allele counts. We created site lists called MAC2 and MAC5 containing only sites with a minor allele count (MAC) across all studies of  $\geq 2$  and  $\geq 5$ , respectively, using bcftools. These sites lists contained 95,855,206 and 51,060,347 sites, respectively.

### Genotype likelihood calculations

The 'samtools mpileup' command was used to generate genotype likelihoods (GLs) at all MAC2 sites on a per sample basis from each sample's BAM file. The pipeline and software versions have been made available online (see **URLs**). The resulting BCF files were merged using the 'bcftools merge' command and the MAC2 sites and alleles extracted using the 'bcftools call' command. The use of 'bcftools call' here made a baseline set of non-LD based genotype calls for each site across all samples. These calls were used for some initial sample QC (see Sample filtering section). We calculated GLs on 33,070 samples in total.

### Site filtering

We used an ad-hoc method for initial variant filtering which enabled us to identify variants that had been filtered out 'quite often' by our submitting studies. For each site and for each cohort, we labelled the site as "called" in that study if the putative calls from bcftools based on GLs exhibited more than one allele in that cohort, or "not called" if it showed no variation. We also used the haplotype sets provided by each study to determine whether each study had filtered out each site or not using their own internal calling pipeline. To determine a threshold of "number of times filtered out", we stratified the sites

according to their called status versus their filtered status (**Supplementary Figure 2**). We also measured the Ts/Tv ratio of the set of SNPs for each of these stratified combinations. SNPs corresponding to the cells above the red line in the figure were filtered out, removing all cells which had been filtered out by more than 4 studies or have Ts/Tv ratio less than 1.7.

We also applied a set of additional site filters as follows. We filtered out sites not on the MAC5 site list to restrict the site list to those that could be imputed well. We also filtered out sites if any study (apart from 1000 Genomes) had a Hardy-Weinberg Equilibrium (HWE) p-value  $< 10^{-10}$ , an overall inbreeding coefficient  $< -0.1$  or a MAF  $> 0.1$  with the site being called in fewer than 3 of the studies and not called in 1000 Genomes (the latter restriction kept sites present at high frequencies in non-European populations that were only called in 1000 Genomes). We also filtered out sites called only in the GoNLstudy or IBD cohort. We completely excluded GPC haplotypes from this step of the site list creation process.

After applying these filters, the site list comprised of 44,038,997 sites. Finally, we made sure that 4,914,335 sites found on a selection of common SNP genotyping arrays and those used in the GIANT consortium and the Global Lipids Consortium (**Supplementary Table 6**) were included in the final site list. The final site list after this filtering contained 44,187,567 sites.

### Sample filtering

Having used 'bcftools call' to extract sites and alleles, we had a set of baseline non-LD genotype calls (see Genotype likelihood calculations section). Based on these calls for chromosome 22, some outlier samples were evident and we removed 150 samples showing evidence for fewer than 10,000 non-reference SNPs or more than 10 singletons across the chromosome. This left a total of 32,920 samples.

To detect possible duplicates we used the original genotype calls submitted by the individual studies. We selected 1000 random sites that (1) were biallelic; (2)

had European minor allele frequency > 5% in 1000GP3; and (3) had no missing data in any of the individual studies. Using the 'bcftools gtcheck' command, we counted the number of genotypes that differed between each sample pair. There was a clear set of 269 sample pairs with very few genotypes differing over the 1000 sites. We identified these samples as duplicates either within or between studies and removed one of the samples in the pair as described in **Supplementary Table 7**. Due to some samples being represented more than twice, there were a total of 261 samples removed due to duplicates. Before genotype calling, we also removed (i) 9 samples for which we had Complete Genomics data so that we could use these samples for testing purposes, (ii) 31 samples from 1000GP3 that were related samples, (iii) 8 samples from the HELIC, AMD and ProjectMinE studies with sample labeling inconsistencies. These filters resulted in 32,611 samples being used for the genotype calling and phasing steps.

In addition, after the phasing, 83 samples from the AMD study were removed as the consent for these samples had been removed. We also repeated the duplicate detection process on the final HRC genotype calls, since some studies increased in size late on within the analysis process. This resulted in an extra 40 samples being removed and a total of 32,488 samples in the final phased reference panel.

#### Genotype calling method leveraging existing haplotype calls

We called genotypes from the HRC samples by extending the SNPTools<sup>22</sup> algorithm to leverage pre-existing haplotypes available from each cohort. Like other phasing and calling approaches<sup>7,10</sup>, SNPTools is an MCMC approach in which each sample's haplotypes and genotypes are iteratively updated using the current estimates of all other samples. A low-complexity Hidden Markov Model (HMM) with just four states is used to update each sample, where the states are a set of four "surrogate parent" haplotypes. The MCMC sampler employs a Metropolis-Hastings (MH) step to sample the set of surrogate parents. In large sample sizes the search space for these surrogate haplotypes is huge and results in low acceptance rates for the sampler. Our extension, called GLPhase (see



**URLs**) uses pre-existing haplotypes to restrict the set of possible haplotypes from which the MH sampler may choose surrogate parent haplotypes. For each individual, we restrict the search space to 200 haplotypes that most closely match the two pre-existing haplotypes of the individual using a Hamming distance metric (100 for each haplotype). We run the method on chunks of 1,024 sites at a time, which is the default setting for SNPtools. Since the pre-existing haplotypes from each study do not contain exactly the same set of sites we filled in missing alleles in the pre-existing haplotypes at our site list using the major allele at each site.

Restricting the search space in this way allows us to reduce the number of burn-in iterations from 56 to 5, the number of sampling iterations from 200 to 95, and the number of MH steps taken at each iteration for each individual from  $2N$  to 100, where  $N$  is the number of samples being phased. This reduces the complexity of our phasing algorithm from  $O(N^2)$  to  $O(N)$ . Although our implementation of the Hamming distance search has complexity  $O(N^2)$ , for  $N = 30,000$ , the impact of the search on run time is small ( $\sim 5\%$  of run time on each chunk). A chunk of 1024 sites can be phased in  $\sim 200$  minutes using  $\sim 1.3$ GB of RAM. Once sample sizes are encountered where the Hamming distance search begins to dominate, our implementation could be replaced with  $O(N \log N)$  clustering algorithms that we have implemented within the SHAPEIT3 algorithm<sup>12</sup>.

To illustrate how important GLPhase was to genotype calling and phasing on such a large sample size, we carried out a comparison to Beagle 3.1, Beagle 4.1 and the original SNPTools method. We ran all four methods on five randomly selected 1024 site chunks from chromosome 20 on the cluster using increasing sample sizes and measured run time. **Supplementary Figure 3** shows that GLPhase is approximately 100 times faster than the next quickest method at the full HRC sample size.

### Final phasing and haplotype estimation

We estimated haplotypes from GLPhase genotype calls using SHAPEIT3<sup>12</sup>. Chromosomes were phased in chunks consisting of 16,000 variants plus 3,300 variants overlapping with neighboring chunks on either side. The non-default command line option `-w 0.5` was used for SHAPEIT3. Chunks were ligated using the `ligateHAPLOTYPES` program (see **URLs**). SHAPEIT3 does not handle multiple variants at the same genomic coordinate, so multiallelic sites (SNPs with 3 or 4 alleles) were shifted by one or two base pairs for rephasing, and then moved back to their original position after chunk ligation.

### Evaluation of genotype calling process

We tested the genotype calling process on data from chromosome 20 with different combinations of site lists and sample sets to assess both the effects of site filtering and the benefits of increasing samples size. We evaluated 3 different site lists: the 1000 Genomes Phase 3 set of sites (775,927), our HRC MAC5 site list (1,128,114) and our HRC MAC5 site list with additional site filtering (1,006,559). We ran the genotype calling method on 3 different sets of samples : the 2,525 original 1000 Genomes Phase 3 samples, a subset of 13,309 HRC samples that we used at an early stage of HRC testing (HRC Pilot) from studies 1000GP3, AMD, GoNL, GoT2D, ORCADES, SardinIA, FINLAND and UK10K, and the near-final full set of 32,905 HRC samples. We called genotypes using GLPhase on each of these 9 datasets and examined genotype discordance compared to Illumina OMNI2.5M genotypes produced by the 1000 Genomes Project. For this comparison, we focused only on genotypes from 365 samples shared across the 3 sample sets and at 42,244 SNP sites. We calculated percentage discordance for the 3 possible genotypes consisting of reference (REF) and alternate (ALT) alleles as well as an overall non-reference allele discordance rate (NRD). Results are shown in **Supplementary Table 2**.

### Downstream imputation performance

We assessed imputation accuracy using high-coverage WGS data made publicly available by Complete Genomics (CG) (see **URLs**). For the pseudo-GWAS samples we used data from 10 CEU samples that also occur in the 1000 Genomes Phase 3 samples. These samples were removed from the various reference panels before

using them to assess imputation performance. Imputation was carried out using IMPUTE2<sup>8</sup> which chooses a custom reference panel for each study individual in each 2 Mb segment of the genome. We set the  $k_{hap}$  parameter of IMPUTE2 to 1000. All other parameters were set to default values. We stratified imputed variants into allele frequency bins and calculated the squared correlation between the imputed allele dosages at variants in each bin with the masked CG genotypes (called aggregate  $r^2$  in **Figure 1**). Non-reference allele frequency for each SNP was calculated from HRC Pilot GLs at  $MAC \geq 10$  sites.

#### Details of imputation and association testing in InCHIANTI study

A total of 1,210 individuals from the InCHIANTI study were genotyped using the Illumina Infinium HumanHap550 genotyping array<sup>13,14</sup>. Individuals were pre-phased using autosomal SNPs after filtering out SNPs with  $MAF < 1\%$ , Hardy-Weinberg  $p$ -value  $< 10^{-04}$ , and missingness  $> 1\%$ . SNPs were also removed if they could not be remapped to the GRCh37 (hg19) human reference. This resulted in 483,991 SNPs available for pre-phasing. Phasing was performed locally using SHAPEIT2<sup>10</sup>.

Imputation was performed remotely using the Michigan Imputation Server (see **URLs**). A total of 39,235,157 SNPs and 47,045,346 variants were imputed from the HRC and 1000 Genomes Phase 3 (v5) reference panels, respectively. An imputation quality threshold of  $r^2 > 0.5$  was subsequently applied to both imputation datasets prior to association testing. This resulted in 15,501,516 and 13,589,949 variants available for association analysis derived from HRC- and 1000 Genomes-based imputation, respectively.

A total of 93 circulating factors available in the InCHIANTI study were double inverse-normalised, while adjusted for age and sex, prior to association testing<sup>14,15</sup>. Association analysis was performed using a linear mixed model framework as implemented in GEMMA (see **URLs**). Plots of association in **Figure 2** were produced using LocusZoom (see **URLs**).

## URLs

Haplotype Reference Consortium

<http://www.haplotype-reference-consortium.org/>

Michigan Imputation Server

<https://imputationserver.sph.umich.edu/>

Sanger Imputation Server

<https://imputation.sanger.ac.uk/>

Oxford Phasing Server

<https://phasingserver.stats.ox.ac.uk/>

Genotype Likelihood calculation scripts

<https://github.com/mcshane/hrc-release1>

GLPhase

<http://www.stats.ox.ac.uk/~marchini/software/gwas/gwas.html>

ligateHAPLOTYPES

[https://mathgen.stats.ox.ac.uk/genetics\\_software/shapeit/shapeit.html](https://mathgen.stats.ox.ac.uk/genetics_software/shapeit/shapeit.html)

Complete Genomics high-coverage WGS genotypes

[http://ftp.1000genomes.ebi.ac.uk/vol1/ftp/technical/working/20130524 CGI\\_Combined\\_calls/](http://ftp.1000genomes.ebi.ac.uk/vol1/ftp/technical/working/20130524 CGI_Combined_calls/)

100,000 Genomes Project

<http://www.genomicsengland.co.uk/the-100000-genomes-project/>

GEMMA

<http://www.xzlab.org/software.html>

LocusZoom

<http://locuszoom.sph.umich.edu/locuszoom/>

## Acknowledgements

J.M acknowledges support from the ERC (Grant no. 617306). W.K acknowledges support from the Wellcome Trust (Grant no. WT097307). S.M and R.D acknowledge support from Wellcome Trust grant WT090851. We are grateful to all participants of all the studies that have contributed data to the HRC.

## Author contributions

The HRC was initially conceived by discussions between J.M, G.A, R.D, M.M and M.B. Analysis and methods development was carried out by S.M, S.D, W.K, O.D, A.W, P.D, H.K. Supervision of the research was provided by J.M, G.A and R.D. The Michigan Imputation server was developed by C.F, L.F, S.S and G.A. The Sanger Imputation server was developed by P.D, S.M and R.D. The Oxford Statistics Phasing server was developed by W.K, K.S and J.M. All other authors contributed datasets to the project or provided advice.

## References

1. International HapMap Consortium *et al.* A second generation human haplotype map of over 3.1 million SNPs. *Nature* **449**, 851–861 (2007).
2. 1000 Genomes Project Consortium *et al.* A global reference for human genetic variation. *Nature* **526**, 68–74 (2015).
3. Genome of the Netherlands Consortium. Whole-genome sequence variation, population structure and demographic history of the Dutch population. *Nat. Genet.* **46**, 818–825 (2014).
4. Huang, J. *et al.* Improved imputation of low-frequency and rare variants using the UK10K haplotype reference panel. *Nature Communications* **6**, 8111 (2015).
5. Sidore, C. *et al.* Genome sequencing elucidates Sardinian genetic architecture and augments association analyses for lipid and blood inflammatory markers. *Nat. Genet.* **47**, 1272–1281 (2015).
6. Marchini, J., Howie, B., Myers, S., McVean, G. & Donnelly, P. A new multipoint method for genome-wide association studies by imputation of genotypes. *Nat. Genet.* **39**, 906–913 (2007).
7. Li, Y., Willer, C. J., Ding, J., Scheet, P. & Abecasis, G. R. MaCH: using sequence and genotype data to estimate haplotypes and unobserved genotypes. *Genet. Epidemiol.* **34**, 816–834 (2010).
8. Howie, B. N., Donnelly, P. & Marchini, J. A flexible and accurate genotype imputation method for the next generation of genome-wide association studies. *PLoS Genet.* **5**, e1000529 (2009).

9. Howie, B., Fuchsberger, C., Stephens, M., Marchini, J. & Abecasis, G. R. Fast and accurate genotype imputation in genome-wide association studies through pre-phasing. *Nat. Genet.* **44**, 955–959 (2012).
10. Delaneau, O., Zagury, J.-F. & Marchini, J. Improved whole-chromosome phasing for disease and population genetic studies. *Nat. Methods* **10**, 5–6 (2013).
11. Fuchsberger, C., Abecasis, G. R. & Hinds, D. A. minimac2: faster genotype imputation. *Bioinformatics* **31**, 782–784 (2015).
12. O'Connell, J., Sharp, K., Delaneau, O. & Marchini, J. Haplotype estimation for biobank scale datasets. *Nat. Genet.* **under review**, (2015).
13. Ferrucci, L. *et al.* Subsystems contributing to the decline in ability to walk: bridging the gap between epidemiology and geriatric practice in the InCHIANTI study. *J Am Geriatr Soc* **48**, 1618–1625 (2000).
14. Melzer, D. *et al.* A Genome-Wide Association Study Identifies Protein Quantitative Trait Loci (pQTLs). *PLoS Genet.* **4**, e1000072 (2008).
15. Wood, A. R. *et al.* Imputation of variants from the 1000 Genomes Project modestly improves known associations and can identify low-frequency variant-phenotype associations undetected by HapMap based imputation. *PLoS ONE* **8**, e64343 (2013).
16. Bathurst, I. C., Travis, J., George, P. M. & Carrell, R. W. Structural and functional characterization of the abnormal Z  $\alpha$ 1-antitrypsin isolated from human liver. *FEBS Letters* **177**, 179–183 (1984).
17. Ferrarotti, I. *et al.* Serum levels and genotype distribution of  $\alpha$ 1-antitrypsin in the general population. *Thorax* **67**, thoraxjnl-2011-201321-674 (2012).
18. Sharp, K., Delaneau, O. & Marchini, J. L. Phasing for medical sequencing using rare variants and large haplotype reference panels. *Bioinformatics* **under review**,
19. CONVERGE consortium. Sparse whole-genome sequencing identifies two loci for major depressive disorder. *Nature* **523**, 588–591 (2015).
20. Gurdasani, D. *et al.* The African Genome Variation Project shapes medical genetics in Africa. *Nature* **517**, 327–332 (2015).
21. Rosenberg, N. A. *et al.* Genetic structure of human populations. *Science*

- 298**, 2381–2385 (2002).
22. Wang, Y., Lu, J., Yu, J., Gibbs, R. A. & Yu, F. An integrative variant analysis pipeline for accurate genotype/haplotype inference in population NGS data. *Genome Res.* **23**, 833–842 (2013).

## Figure Legends

**Figure 1: Performance of imputation using different reference panels.** The x-axis shows the non-reference allele frequency of the SNP being imputed on a log scale. The y-axis shows imputation accuracy measured by aggregate  $r^2$  when imputing SNP genotypes into 10 CEU samples.

**Figure 2 : Association signal  $\alpha_1$ -antitripsin phenotype at the *SERPINA1* locus.** Association test statistics on the  $-\log_{10}$  p-value scale (y-axis) are plotted for each SNP position (x-axis). Three different imputation panels were used : HapMap2 (left), 1000GP3 (middle), HRC release 1 (right). The SNP rs28929474 is shown as a purple.

## Author list

Shane McCarthy<sup>1\*</sup>, Sayantan Das<sup>2\*</sup>, Warren Kretschmar<sup>3\*</sup>, Olivier Delaneau<sup>4</sup>, Andrew R. Wood<sup>16</sup>, Hyun Min Kang<sup>2</sup>, Christian Fuchsberger<sup>2</sup>, Petr Danecek<sup>30</sup>, Kevin Sharp<sup>58</sup>, Yang Luo<sup>1</sup>, Carlo Sidore<sup>5</sup>, Alan Kwong<sup>2</sup>, Nicholas Timpson<sup>6</sup>, Seppo Koskinen<sup>7</sup>, Scott Vrieze<sup>8,9</sup>, Laura Scott<sup>2</sup>, He Zhang<sup>10</sup>, Anubha Mahajan<sup>3</sup>, Jan Veldink<sup>11</sup>, Ulrike Peters<sup>12,13</sup>, Carlos Pato<sup>14</sup>, Cornelia M. van Duijn<sup>15</sup>, Christopher E. Gillies<sup>17</sup>, Ilaria Gandin<sup>18</sup>, Massimo Mezzavilla<sup>19</sup>, Arthur Gilly<sup>1</sup>, Massimiliano Cocca<sup>20</sup>, Michela Traglia<sup>20</sup>, Andrea Angius<sup>4</sup>, Dorret I. Boomsma<sup>21</sup>, Kari Branham<sup>22</sup>, Chad Brummet<sup>23</sup>, Fabio Busonero<sup>5</sup>, Harry Campbell<sup>24</sup>, Andrew Chan<sup>25,26</sup>, Sai Chen<sup>2,27</sup>, Emily Chew<sup>28</sup>, Francis S. Collins<sup>29</sup>, George Davey Smith<sup>6</sup>, George Dedoussis<sup>31</sup>, Aliko-Eleni Farmaki<sup>31</sup>, Luigi Ferrucci<sup>32</sup>, Lukas Forer<sup>33</sup>, Ross M. Fraser<sup>24</sup>, Stacey Gabriel<sup>34</sup>, Shawn Levy<sup>35</sup>, Leif Groop<sup>36-38</sup>, Tabitha Harrison<sup>12</sup>, Andrew Hattersley<sup>39</sup>, Oddgeir L. Holmen<sup>40</sup>, Kristian Hveem<sup>40</sup>, Matthias Kretzler<sup>27,41</sup>, James Lee<sup>42,43</sup>, Matt McGue<sup>44</sup>, Thomas Meitinger<sup>45,46</sup>, David Melzer<sup>47</sup>, Josine Min<sup>6</sup>, Karen L. Mohlke<sup>48</sup>, John Vincent<sup>49,50</sup>, Gerome Breen<sup>51</sup>, Deborah Nickerson<sup>52</sup>, Aarno Palotie<sup>34,52,53</sup>, Michele Pato<sup>14</sup>, Nicola Pirastu<sup>18</sup>, Melvin McInnis<sup>54</sup>, Brent Richards<sup>55</sup>, Cinzia Sala<sup>20</sup>, Veikko Salomaa<sup>7</sup>, David



Schlessinger<sup>56</sup>, Sebastian Schoenheer<sup>33</sup>, P Eline Slagboom<sup>59</sup>, Kerrin Small<sup>59</sup>, Timothy Spector<sup>60</sup>, Dwight Stambolian<sup>61</sup>, Marcus Tuke<sup>16</sup>, Jaakko Tuomilehto<sup>63-66</sup>, Leonard Van den Berg<sup>11</sup>, Wouter Van Rheenen<sup>11</sup>, Cisca Wijmenga<sup>85</sup>, Daniela Toniolo<sup>20</sup>, Eleftheria Zeggini<sup>1</sup>, Paolo Gasparini<sup>18,67</sup>, Matthew G. Sampson<sup>17</sup>, James F. Wilson<sup>24,68</sup>, Timothy Frayling<sup>16</sup>, Paul de Bakker<sup>69,70</sup>, Morris A. Swertz<sup>71,72</sup>, Steven McCarroll<sup>73,74</sup>, Charles Kooperberg<sup>12</sup>, Annelot Dekker<sup>11</sup>, David Altshuler<sup>75-80</sup>, Cristen Willer<sup>10,27</sup>, William Iacono<sup>44</sup>, Samuli Ripatti<sup>83</sup>, Nicole Soranzo<sup>1</sup>, Klaudia Walter<sup>1</sup>, Anand Swaroop<sup>84</sup>, Francesco Cucca<sup>5</sup>, Carl Anderson<sup>1</sup>, Michael Boehnke<sup>2</sup>, Mark I. McCarthy<sup>3,81,82</sup>, Richard Durbin<sup>1\*\*</sup>, Goncalo Abecasis<sup>2\*\*</sup>, Jonathan Marchini<sup>58,3\*\*</sup>

\* these authors should be consider joint first author on this paper

\*\* these authors jointly supervised the research

#### Affiliations

1. Human Genetics, Wellcome Trust Sanger Institute, Hinxton, UK.
2. Department of Biostatistics and Center for Statistical Genetics, University of Michigan, Ann Arbor, Michigan, USA.
3. Wellcome Trust Centre for Human Genetics, University of Oxford, Oxford, UK.
4. Genetics and Development, University of Geneva, Geneva, Switzerland.
5. IRGB, CNR, Sardinia, Italy.
6. MRC Integrative Epidemiology Unit, University of Bristol, Oakfield Grove, UK.
7. THL, Finland.
8. Institute for Behavioral Genetics, University of Colorado, Boulder, Colorado, USA.
9. Department of Psychology and Neurosurgery, University of Colorado, Boulder, Colorado, USA
10. Department of Internal Medicine, Division of Cardiovascular Medicine, University of Michigan, Ann Arbor, Michigan, USA.
11. Department of Neurology and Neurosurgery, Brain Center Rudolf Magnus, Utrecht, the Netherlands.

12. Public Health Sciences Division, Fred Hutchinson Cancer Research Center, Seattle, Washington, USA.
13. Department of Epidemiology, University of Washington School of Public Health, Seattle, Washington, USA.
14. Department of Psychiatry, SUNY Downstate, Brooklyn, New York, USA.
15. Genetic Epidemiology Unit, Department of Epidemiology, ErasmusMC, Rotterdam, the Netherlands.
16. Genetics of Complex Traits, Institute of Biomedical Science, University of Exeter Medical School, Exeter, UK.
17. Department of Pediatrics-Nephrology, University of Michigan School of Medicine, Ann Arbor, Michigan, USA.
18. DSM, University of Trieste, Trieste, Italy.
19. Genetica Medica, IRCCS-Burlo Garofolo, Trieste, Italy.
20. Genetics and Cell Biology, San Raffaele Research Institute, Milano, Italy.
21. Department of Biological Psychology, VU Amsterdam, Neuroscience Campus, Amsterdam, the Netherlands.
22. Department of Ophthalmology and Visual Sciences, University of Michigan, Ann Arbor, Michigan, USA.
23. Department of Anesthesiology, University of Michigan, Ann Arbor, Michigan, USA.
24. The Usher Institute of Population Health Sciences and Informatics, University of Edinburgh, Edinburgh, UK.
25. Division of Gastroenterology, Massachusetts General Hospital and Harvard Medical School, Boston, Massachusetts, USA.
26. Brigham and Women's Hospital, Channing Division of Network Medicine, Boston, Massachusetts, USA.
27. Departments of Computational Medicine & Bioinformatics, University of Michigan, Ann Arbor, Michigan, USA.
28. Division of Epidemiology and Clinical Applications, National Eye Institute, Bethesda, Maryland, USA.
29. Medical Genomics and Metabolic Genetics Branch, National Human Genome Research Institute, National Institutes of Health, Bethesda, Maryland, USA.

30. Vertebrate Resequencing Informatics, Wellcome Trust Sanger Institute, Oxford, UK.
31. Department of Nutrition and Dietetics, School of Health Science and Education, Harokopio University, Athens, Greece.
32. Longitudinal Studies Section, Clinical Research Branch, Gerontology Research Centre, National Institute on Aging, Baltimore, Maryland, USA.
33. Center for Biomedicine, University of Innsbruck, Bolzano, Italy.
34. Program in Medical and Population Genetics, Broad Institute of MIT and Harvard, Cambridge, Massachusetts, USA.
35. Genomics, HudsonAlpha Institute for Biotechnology, Huntsville, Alabama, USA.
36. Department of Clinical Sciences, Diabetes and Endocrinology, University of Lund, Malmo, Sweden.
37. Finnish Institute for Molecular Medicine, University of Helsinki, Helsinki, Finland.
38. Research Programs Unit, Diabetes and Obesity, University of Helsinki, Helsinki, Finland.
39. Department of Diabetes and Vascular Medicine, University of Exeter Medical School, Exeter, UK.
40. Hunt Research Centre, Department of Public Health and General Practice, Norwegian University of Science and Technology, Levanger, Norway.
41. Department of Internal Medicine, University of Michigan School of Medicine, Ann Arbor, Michigan, USA.
42. Cambridge Institute for Medical Research, University of Cambridge, Cambridge, UK.
43. Department of Medicine, University of Cambridge School of Clinical Medicine, Addenbrooke's Hospital, Cambridge, UK.
44. Department of Psychology, University of Minnesota, Minneapolis, Minnesota, USA.
45. Institute of Human Genetics, Helmholtz Zentrum München, German Research Center for Environmental Health, Neuherberg, Germany.
46. Institute of Human Genetics, Technische Universität München, Munich, Germany.

47. Epidemiology and Public Health, Institute of Biomedical and Clinical Science, University of Exeter Medical School, Exeter, UK.
48. Department of Genetics, University of North Carolina, Chapel Hill, Chapel Hill, North Carolina, USA.
49. Molecular Neuropsychiatry and Development Laboratory, Centre for Addiction and Mental Health, Toronto, Canada.
50. Institute of Medical Science, University of Toronto and Department of Psychiatry, Toronto, Canada.
51. MRC Social Genetic and Developmental Psychiatry Centre, Institute of Psychiatry, Psychology, and Neuroscience, King's College, London, UK.
52. Genome Sciences, University of Washington, Seattle, Washington, USA.
53. Institute for Molecular Medicine, FIMM, Helsinki, Finland.
54. Department of Psychiatry, University of Michigan, Ann Arbor, Michigan, USA.
55. Massachusetts General Hospital, Boston, Massachusetts, USA.
56. Departments of Medicine and Human Genetics, McGill University, Montreal, Canada.
57. National Institute on Aging, National Institutes of Health, Baltimore, Maryland, USA.
58. Department of Statistics, University of Oxford, Oxford, UK.
59. Molecular Epidemiology Section, Department of Medical Statistics and Bioinformatics, Leiden University Medical Center, Leiden, the Netherlands.
60. The Department of Twin Research and Genetic Epidemiology, King's College, London, UK.
61. Department of Ophthalmology, University of Pennsylvania, Philadelphia, Pennsylvania, USA.
62. Genetics of Complex Traits, Institute of Biomedical and Clinical Science, University of Exeter Medical School, Exeter, UK.
63. Chronic Disease Prevention Unit, National Institute for Health and Welfare, Helsinki, Finland.
64. Instituto de Investigacion Sanitaria del Hospital Universitario LaPaz, University Hospital LaPaz, Autonomous University of Madrid, Madrid, Spain.
65. Center for Vascular Prevention, Danube University Krems, Krems, Austria.
66. Diabetes Research Group, King Abdulaziz University, Saudi Arabia.

67. Department of Experimental Genetics, Sidra, Doha, Qatar.
68. MRC Human Genetics Unit, Institute of Genetics and Molecular Medicine, University of Edinburgh, Western General Hospital, Edinburgh, UK.
69. Medical Genetics, University Medical Center, Utrecht, the Netherlands.
70. Department of Epidemiology, Julius Center for Health Sciences and Primary Care, University Medical Center Utrecht, Utrecht, the Netherlands.
71. Department of Genetics, University of Groningen, University Medical Center Groningen, Groningen, the Netherlands.
72. Genomics Coordination Center, University of Groningen, University Medical Center Groningen, Groningen, the Netherlands.
73. Stanley Center for Psychiatric Research, Broad Institute of MIT and Harvard, Cambridge, Massachusetts, USA.
74. Department of Genetics, Harvard Medical School, Boston, Massachusetts, USA.
75. Program in Medical and Population Genetics, Broad Institute, Cambridge, Massachusetts, USA.
76. Department of Molecular Biology, Massachusetts General Hospital, Boston, Massachusetts, USA.
77. Diabetes Research Center (Diabetes Unit), Department of Medicine, Massachusetts General Hospital, Boston, Massachusetts, USA.
78. Department of Medicine, Harvard Medical School, Boston, Massachusetts, USA.
79. Department of Genetics, Harvard Medical School, Boston, Massachusetts, USA.
80. Department of Biology, Massachusetts Institute of Technology, Cambridge, Massachusetts, USA.
81. Oxford Centre for Diabetes, Endocrinology and Metabolism, Radcliffe Department of Medicine, University of Oxford, Oxford, UK.
82. Oxford NIHR Biomedical Research Centre, Churchill Hospital, Headington, Oxford, UK.
83. Department of Public Health, University of Helsinki, Helsinki, Finland.

84. Neurobiology-Neurodegeneration and Repair Laboratory, National Eye  
Institute, National Institutes of Health, Bethesda, Maryland, USA.

85 . Department of Genetics, University Medical Center Groningen, Netherlands

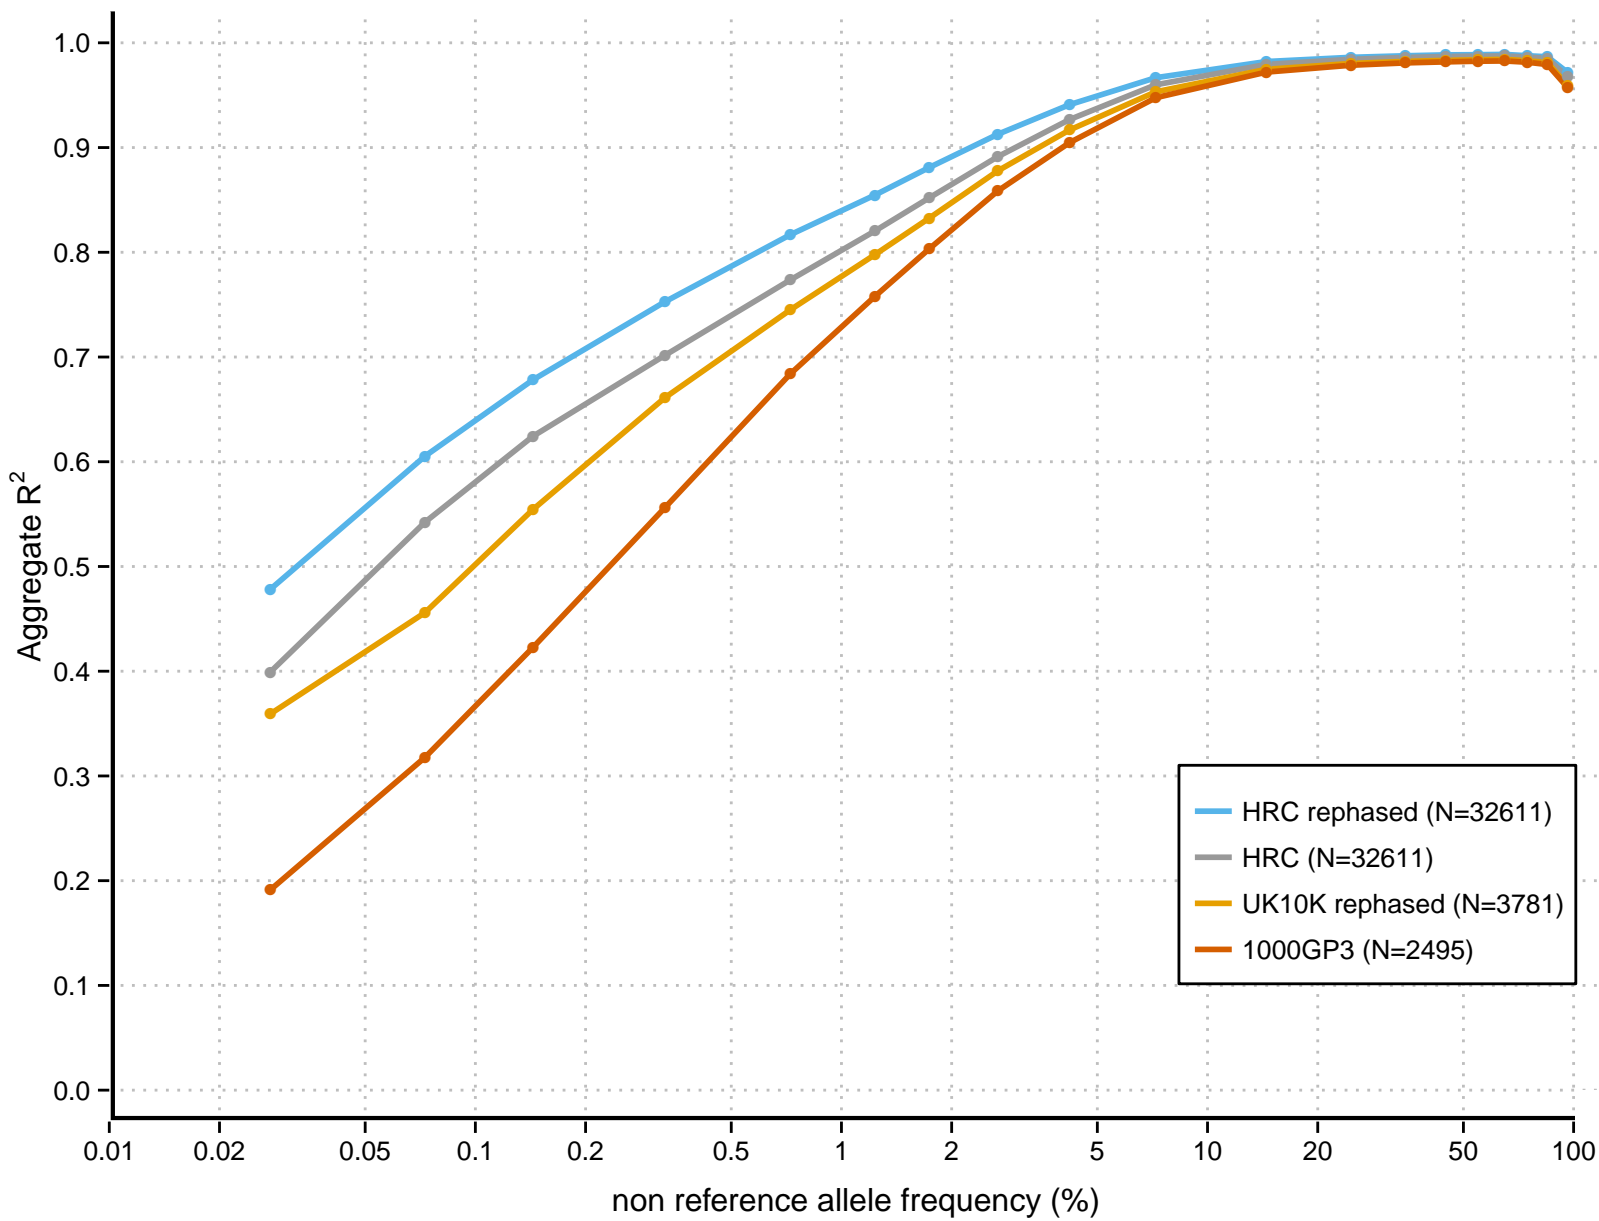

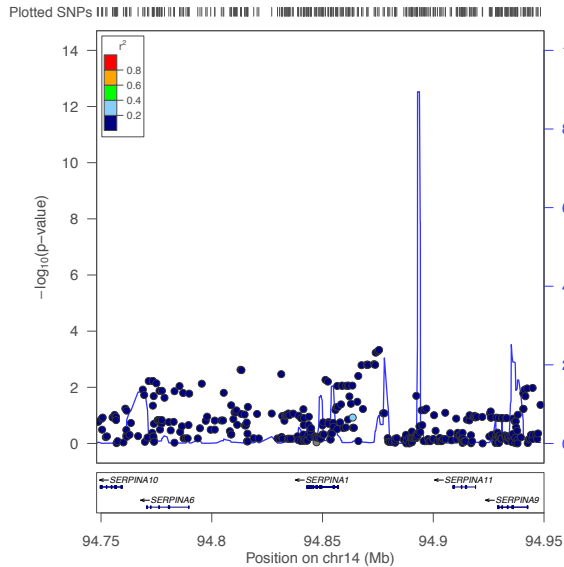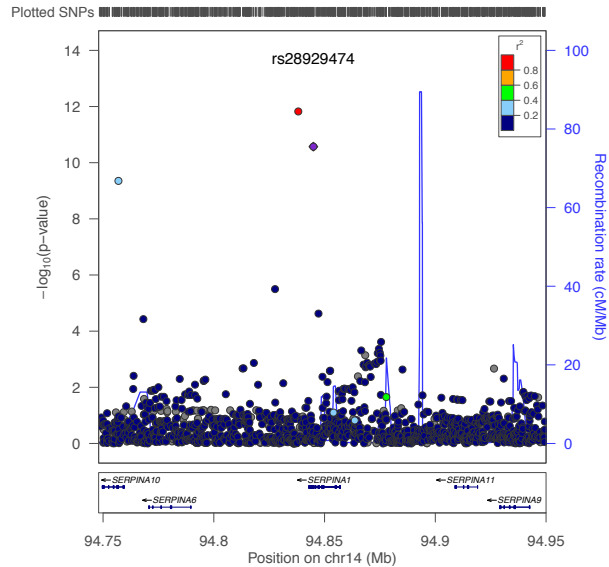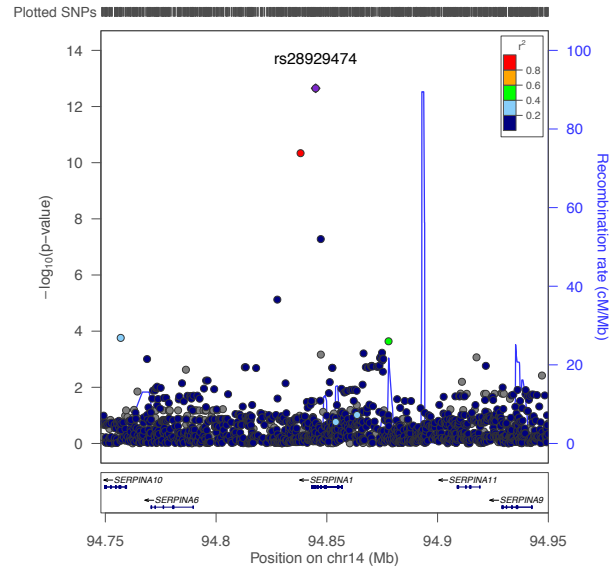

Source: https://www.biorxiv.org/content/10.1101/035170v1.full.pdf
